# Supplementary material
Source: publisher figshare collection journal article supplement (https://acs.figshare.com/ndownloader/files/5815086)
Supplement: Supplementary file 1 [file 5815086]

*Supporting Information:*

## Functionalization of the C(100)-2×1 Surface by 1,3-Dipolar Cycloadditions: A Theoretical Prediction

*Xin Lu,\* Xin Xu, Nanqin Wang, Qianer Zhang*

State Key Laboratory for Physical Chemistry of Solid Surfaces; Institute of Physical Chemistry,  
Department of Chemistry, Xiamen University, Xiamen 361005, China

Optimized geometries for the reactants, transition states and products of the  $\text{CH}_3\text{N}_3$  and  $\text{CH}_2\text{N}_2$  reactions with the  $\text{C}_{9}\text{H}_{12}$  surface model are presented in Figure 2 and Figure 3 (see in the following page), respectively.

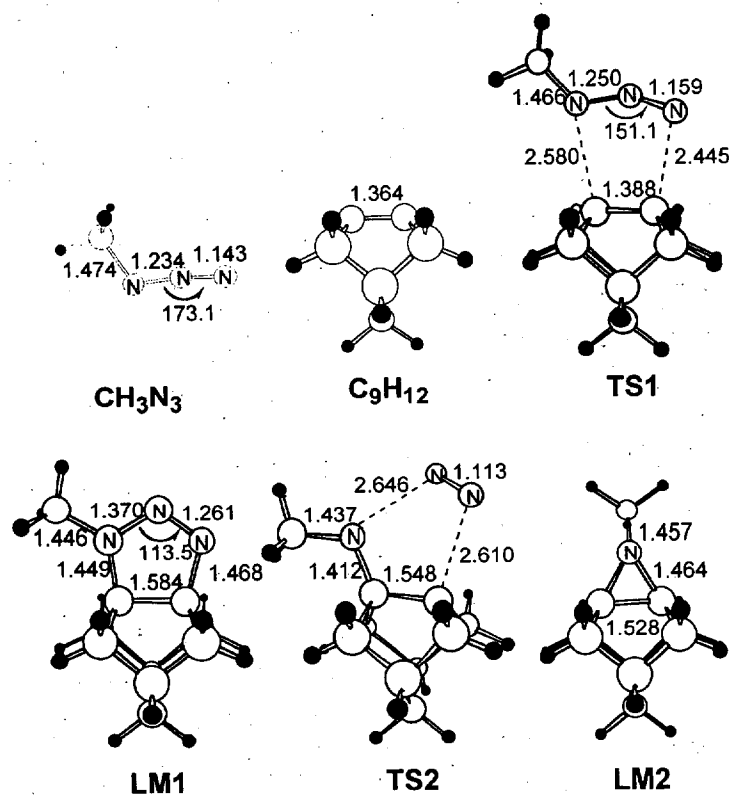

Figure 2  $\text{CH}_3\text{N}_3 + \text{C}_9\text{H}_{12}$

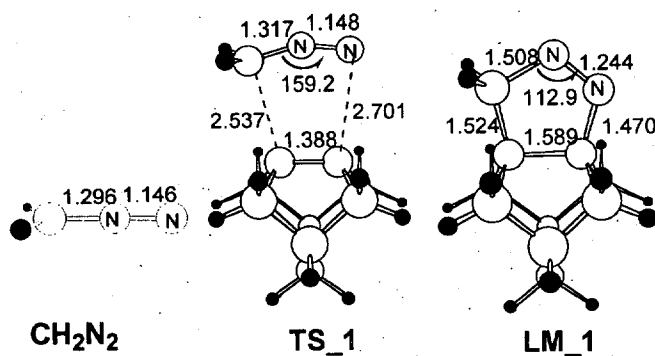

Figure 3  $\text{CH}_2\text{N}_2 + \text{C}_9\text{H}_{12}$
